# Supplementary material for: New Copper and Oxomolybdate Robson‐Type Polynuclear Macrocyclic Complexes: Structure, Spectroscopy, and Electrochemical Properties
Source: Hindawi journal article supplement (doi:10.1155/2015/506932), 2015-01-01
Supplement: f1 [file 506932.f1.pdf]

UP

|                                            |                                                                                   |                                                                               |
|--------------------------------------------|-----------------------------------------------------------------------------------|-------------------------------------------------------------------------------|
| Empirical formula                          | $C_{24}H_{28}Mo_3N_4O_{11} \cdot C_{24}H_{27}Mo_3N_4O_{11} \cdot 2(C_2H_6OS)$ (1) | $C_{52}H_{52}Cu_4Mo_8N_8O_{34}S_2 \cdot 4(C_2H_6OS)$ (2)                      |
| Formula weight                             | 1827.89                                                                           | 2743.42                                                                       |
| $T$ (K)                                    | 100(2) K                                                                          | 100(2) K                                                                      |
| Radiation, $\lambda$                       | 0.71073 Å                                                                         | 0.71073 Å                                                                     |
| Crystal system, space group                | Monoclinic                                                                        | Monoclinic                                                                    |
| Space Group                                | P2(1)/n                                                                           | C2/c                                                                          |
| Unit cell dimensions                       | $a = 17.4435$ (6) Å<br>$b = 15.6194$ (5) Å<br>$c = 24.9582$ (9) Å                 | $a = 28.767$ (11) Å<br>$b = 14.296$ (5) Å<br>$c = 22.177$ (8) Å               |
|                                            | $\alpha = 90^\circ$<br>$\beta = 100.844$ (3) $^\circ$<br>$\gamma = 90^\circ$      | $\alpha = 90^\circ$<br>$\beta = 109.920$ (14) $^\circ$<br>$\gamma = 90^\circ$ |
| Volume                                     | 6678.6 (4) Å <sup>3</sup>                                                         | 8575 (5) Å <sup>3</sup>                                                       |
| Z, Calculated Density                      | 4, 1.818 Mg m <sup>-3</sup>                                                       | 2.125 Mg m <sup>-3</sup>                                                      |
| Absorption coefficient                     | 1.24 mm <sup>-1</sup>                                                             | 2.34 mm <sup>-1</sup>                                                         |
| $F(000)$                                   | 3644                                                                              | 5424                                                                          |
| Crystal size (mm)                          | 0.23 × 0.15 × 0.1                                                                 | 0.17 × 0.15 × 0.13 mm <sup>3</sup>                                            |
| Theta range / $^\circ$                     | 2.9 to 26.9 $^\circ$                                                              | 2.8 to 26.4                                                                   |
| Index ranges                               | -21 ≤ $h$ ≤ 21<br>-18 ≤ $k$ ≤ 18<br>-30 ≤ $l$ ≤ 30                                | -35 ≤ $h$ ≤ 35<br>-17 ≤ $k$ ≤ 17<br>-27 ≤ $l$ ≤ 27                            |
| Reflections collected                      | 58140                                                                             | 165405                                                                        |
| Independent reflections                    | 12210 [ $R_{int} = 0.138$ ]                                                       | 8783 [ $R_{int} = 0.042$ ]                                                    |
| Completeness to theta max /                | 99.5 %                                                                            | 99.5                                                                          |
| Refinement method                          | Full-matrix least-squares on $F^2$                                                | Full-matrix least-squares on $F^2$                                            |
| Data / restraints / parameters             | 12210 / 49 / 837                                                                  | 8783 / 650 / 564                                                              |
| Goodness-of-fit on $F^2$                   | 1.03                                                                              | 1.06                                                                          |
| Final $R$ indices [ $F^2 > 2\sigma(F^2)$ ] | $R_1 = 0.0897$<br>$wR_2 = 0.2309$                                                 | $R_1 = 0.049$<br>$wR_2 = 0.137$                                               |
| $R$ indices (all data)                     | $R_1 = 0.1554$<br>$wR_2 = 0.2863$                                                 | $R_1 = 0.0544$<br>$wR_2 = 0.1427$                                             |
| Largest diff. peak and hole                | 6.73 and -1.02 e.Å <sup>-3</sup>                                                  | 2.93, -3.22                                                                   |

## Supplementary data

1

C CDC 1050597 and 1051415 contain the supplementary crystallographic data for this

paper. These data can be obtained free of charge at

[www.ccdc.cam.ac.uk/conts/retrieving.html](http://www.ccdc.cam.ac.uk/conts/retrieving.html) [or from the Cambridge Crystallographic

Data Centre (CCDC), 12 Union Road, Cambridge CB2 1EZ, UK; fax: +44(0)1223- 336033; email: [deposit@ccdc.cam.ac.uk](mailto:deposit@ccdc.cam.ac.uk)].
